# Supplementary material for: Activation of Nrf2 in keratinocytes causes chloracne (MADISH)-like skin disease in mice
Source: PubMed Central journal article supplement (PMC3992072; doi:10.1002/emmm.201303281), 2014-02-06
Supplement: emmm0006-0442-sd9.pdf [file emmm0006-0442-sd9.pdf]

(left panel) and basal cell carcinoma (BCC) (right panel). Note strong SPRR2 and SLPI staining in differentiated keratinocytes of normal skin, but weaker staining in BCCs. Scale bar: 100 $\mu$ m.

|         |              | Female       |                | Male         |              |
|---------|--------------|--------------|----------------|--------------|--------------|
|         |              | tg/wt        | tg/tg          | tg/wt        | tg/tg        |
| 6 month | Incidence    | 0%<br>(0/5)  | 25%<br>(2/8)   | 0%<br>(0/4)  | 33%<br>(1/3) |
|         | Multiplicity | 0            | 0.25           | 0            | 0.33         |
| 1 year  | Incidence    | 0%<br>(0/12) | 27%<br>(3/11)  | 0%<br>(0/10) | 71%<br>(5/7) |
|         | Multiplicity | 0            | 0.6            | 0            | 1            |
| 2 years | Incidence    | 0%<br>(0/12) | 58%<br>(10/17) | 25%<br>(1/4) | 84%<br>(5/6) |
|         | Multiplicity | 0            | 1.2            | 0.25         | 1.5          |

**Supporting Information Table S1:** Incidence and multiplicity of macroscopically visible cysts in tail skin of 1 year- and 2 year-old female and male control and K5cre-CMVcaNrf2 mice. Cyst incidence is shown in percentage and in absolute numbers (in brackets).

| Name                                   | Forward               | Reverse                 |
|----------------------------------------|-----------------------|-------------------------|
| <i>qRT-PCR primers for mouse genes</i> |                       |                         |
| <i>Ahr</i>                             | ATCGCCACTCAGAGACCACT  | AGGGCTGGAGATCTCGTACA    |
| <i>Adph</i>                            | CCTCAGCTCTCCTGTTAGGC  | AGGTTGGCCACTCTCATCAC    |
| <i>Areg</i>                            | AGGCTCAGGCCATTATGCAGC | TCCCCTGTGGAGAGTTCACTGCC |
