# Supplementary material for: Activation of Nrf2 in keratinocytes causes chloracne (MADISH)-like skin disease in mice
Source: PubMed Central journal article supplement (PMC3992072; doi:10.1002/emmm.201303281), 2014-02-06
Supplement: emmm0006-0442-sd10.pdf [file emmm0006-0442-sd10.pdf]

(left panel) and basal cell carcinoma (BCC) (right panel). Note strong SPRR2 and SLPI staining in differentiated keratinocytes of normal skin, but weaker staining in BCCs. Scale bar: 100 $\mu$ m.

|         |              | Female       |                | Male         |              |
|---------|--------------|--------------|----------------|--------------|--------------|
|         |              | tg/wt        | tg/tg          | tg/wt        | tg/tg        |
| 6 month | Incidence    | 0%<br>(0/5)  | 25%<br>(2/8)   | 0%<br>(0/4)  | 33%<br>(1/3) |
|         | Multiplicity | 0            | 0.25           | 0            | 0.33         |
| 1 year  | Incidence    | 0%<br>(0/12) | 27%<br>(3/11)  | 0%<br>(0/10) | 71%<br>(5/7) |
|         | Multiplicity | 0            | 0.6            | 0            | 1            |
| 2 years | Incidence    | 0%<br>(0/12) | 58%<br>(10/17) | 25%<br>(1/4) | 84%<br>(5/6) |
|         | Multiplicity | 0            | 1.2            | 0.25         | 1.5          |

**Supporting Information Table S1:** Incidence and multiplicity of macroscopically visible cysts in tail skin of 1 year- and 2 year-old female and male control and K5cre-CMVcaNrf2 mice. Cyst incidence is shown in percentage and in absolute numbers (in brackets).

| Name                                   | Forward               | Reverse                 |
|----------------------------------------|-----------------------|-------------------------|
| <i>qRT-PCR primers for mouse genes</i> |                       |                         |
| <i>Ahr</i>                             | ATCGCCACTCAGAGACCACT  | AGGGCTGGAGATCTCGTACA    |
| <i>Adph</i>                            | CCTCAGCTCTCCTGTTAGGC  | AGGTTGGCCACTCTCATCAC    |
| <i>Areg</i>                            | AGGCTCAGGCCATTATGCAGC | TCCCCTGTGGAGAGTTCACTGCC |

|                     |                            |                           |
|---------------------|----------------------------|---------------------------|
| <i>Btc</i>          | CCAATGGCTCTCTTTGTGGA       | CCGAGAGAAGTGGGTTTTCA      |
| <i>DNA_ns</i>       | GCAGCACAAGGAACATTCAG       | CGCCTAACTGCAGGTGATGT      |
| <i>Egf</i>          | TCGAGAGAAGCGAGAGAAGC       | CACCAATTGCTGGTGATTTG      |
| <i>Epgn</i>         | ATGAGCTGAAGCAAGCCATT       | CTCCCTCCAGAGCAGATGAT      |
| <i>Epgn_ARE</i>     | TGAAATCAATGGATGAGGATG      | TGCCCTGATGCTAAGGTTTC      |
| <i>Epgn_prom</i>    | CAGCAGGGAATTTTCCACAT       | GGCACTCGCACACTTGTTTA      |
| <i>Ereg</i>         | TATCAGCACAACCGTGATCC       | GGGATCGTCTTCCATCTGAAC     |
| <i>Gapdh</i>        | TCGTGGATCTGACGTGCCGCCTG    | CACCACCCTGTTGCTGTAGCCGTAT |
| <i>Gclc</i>         | AACAAGAAACATCCGGCATC       | CGTAGCCTCGGTAAAATGGA      |
| <i>Gclm</i>         | TCCCATGCAGTGGAGAAGAT       | AGCTGTGCAACTCCAAGGAC      |
| <i>Gsta3</i>        | TACTTTGATGGCAGGGGAAG       | GCACTTGCTGGAACATCAGA      |
| <i>Hbegf</i>        | TAGTCCCCTGAGGAGGAC         | TCATGGCTGCTGGTGAATA       |
| <i>Lce3a</i>        | CCTATCACCTTCCCATCTGGT      | GCTGGCACTGCTTCTGACTC      |
| <i>Mc5r</i>         | CAGAGCCCGGTAAACAGAAG       | CACTTCTTGGCATCGGATTT      |
| <i>Nqo1</i>         | CTGGCCCATTCAGAGAAGAC       | GTCTGCAGCTTCCAGCTTCT      |
| <i>Nqo1_ARE</i>     | AGCAGAACGCAGCACGAAT        | CACTCAGCCGTGGGAAGT        |
| <i>Nqo1_ns</i>      | TACGCTGTAGTGGTGGTGGGA      | TCTGGGGACTTGGGTATCTG      |
| <i>Nrf2</i>         | CCAGCTACTCCCAGGTTGC        | CCAAACTTGCTCCATGTCCT      |
| <i>Plin2 (Adph)</i> | CCTCAGCTCTCCTGTTAGGC       | AGGTTGGCCACTCTCATCAC      |
| <i>Pparg</i>        | TGATTACAAATATGACCTGAAGCTCC | TTGTAGAGCTGGGTCTTTTCAGAA  |
| <i>S100A7</i>       | CTTGTCCCTGGAGGAGTTGA       | GCAGATCTGGTTGTCCTTGTT     |
| <i>Scd1</i>         | CGGTGCACAACGTACCAAT        | TTGATCCAGAGGACGTGCAT      |
| <i>Scd2</i>         | GTCGCTGAGGTCTGAAGCTC       | TTGTGGTGGTGGCTGAGTAA      |
| <i>Scd3</i>         | CTGCAAGAAGAGATGACGCC       | GTAGACAAACGCGAAGAGGC      |
| <i>Scd4</i>         | TCTAGGCTTCCAAGGAGCAA       | TTCAGGCCGGATATCTTCTG      |
| <i>Slpi</i>         | GGGCAAATACAAGTGCTGTG       | CCTGGGAGCAGGGAAGTAGT      |

|                                                                   |                                          |                        |
|-------------------------------------------------------------------|------------------------------------------|------------------------|
| <i>Sprr2a</i>                                                     | TGAGGCAGGCAATCCTATAAA                    | GATTGCACTGCTGCTGGTAG   |
| <i>Sprr2d</i>                                                     | CTGGTACTCAAGGCCGAGAC                     | CAGGGCACTTTGGTGGAG     |
| <i>Srxn1</i>                                                      | CGGTGCACAACGTACCAAT                      | TTGATCCAGAGGACGTTCGAT  |
| <i>Tgfa</i>                                                       | CTGAGTGACTCACCCGTGGC                     | GCGGAGCTGACAGCAGTGGAT  |
| <b><i>qRT-PCR primers for human genes</i></b>                     |                                          |                        |
| <i>AHR</i>                                                        | ATCCAGTACTGCCAGGCCAA                     | AAGGTCTGGCTTCTGACGGA   |
| <i>CYP1A1</i>                                                     | CCAGCTCAGCTCAGTACCTCA                    | AAGATGACAGAGGCCAGAAGA  |
| <i>CYP1B1</i>                                                     | AACGTACCGGCCACTATCAC                     | GCACTCGAGTCTGCACATCA   |
| <i>GAPDH</i>                                                      | AAGGTCGGAGTCAACGGATT                     | CTCCTGGAAGATGGTGATGG   |
| <i>GCLC</i>                                                       | ACTCCCTCATCCATCTGGCAA                    | ACTCCCTCATCCATCTGGCAA  |
| <i>EPGN</i>                                                       | TGACAGCACTGACCGAAGAG                     | CCAGGCAAAGGTGTGAGAAC   |
| <i>K14</i>                                                        | AGGAGGAGATGAATGCC                        | AGCTCCTCTGTCTTGGTGAAG  |
| <i>NQO1</i>                                                       | GTGATATTCCAGTTCCCCCTGC                   | AAGCACTGCCTTCTTACTCCGG |
| <i>NRF2</i>                                                       | AGGTTGCCACATTCCCAA                       | AATGTCTGCGCCAAAAGCTG   |
| <i>SLPI</i>                                                       | CTGTGGAAGGCTCTGGAAAG                     | CAGTCACTCTGGCACTCAGG   |
| <i>SRXN1</i>                                                      | CAAGGTGCAGAGCCTCGT                       | GATGGTCTCTCGCTGCAGTT   |
| <i>SPRR2D</i>                                                     | CTTTCTCCTTAACCTGTGGCCT                   | GCAGTATGGCAGCCTCAGA    |
| <b><i>siRNAs</i></b>                                              |                                          |                        |
| <i>AHR1</i>                                                       | GGCUCUUUCAAGAUAGUAA [dTdT]               |                        |
| <i>AHR2</i>                                                       | CGGAUGAAAUCCUGACGUA [dTdT]               |                        |
| <i>Nrf2-2</i>                                                     | GAGAAAGAAUUGCCUGUAA [dTdT]               |                        |
| <i>Nrf2-7</i>                                                     | GCUCAUACUUUAUAAGUAA [dTdT]               |                        |
| <b><i>Primers for cloning of in situ hybridization probes</i></b> |                                          |                        |
| <i>Epgn-T7</i>                                                    | taatacgactcactatagggATGTTGAGTGCCCGAAGAAC |                        |
| <i>Epgn-SP6</i>                                                   | gatttagtgacactatagCCTAGCACAGCACAGCAGAG   |                        |

**Supporting Information Table S2: List of oligonucleotides and their sequences**
