# Supplementary material for: Activation of Nrf2 in keratinocytes causes chloracne (MADISH)-like skin disease in mice
Source: PubMed Central journal article supplement (PMC3992072; doi:10.1002/emmm.201303281), 2014-02-06
Supplement: emmm0006-0442-sd11.pdf [file emmm0006-0442-sd11.pdf]

**SUPPORTING INFORMATION related to the article**

**Activation of Nrf2 in keratinocytes causes chloracne  
(MADISH)-like skin disease in mice**

*Matthias Schäfer, Ann-Helen Willrodt, Svitlana Kurinna, Andrea S. Link, Hany Farwanah, Alexandra Geusau, Florian Gruber, Olivier Sorg, Aaron J. Huebner, Dennis R. Roop, Konrad Sandhoff, Jean-Hilaire Saurat, Erwin Tschachler, Marlon R. Schneider, Lutz Langbein, Wilhelm Bloch, Hans-Dietmar Beer, and Sabine Werner*

**TABLE OF CONTENTS**

|                                                        |          |
|--------------------------------------------------------|----------|
| <b>Supporting Information Figures and Tables .....</b> | <b>2</b> |
| Supporting Information Fig S1 .....                    | 2        |
| Supporting Information Fig S2 .....                    | 4        |
| Supporting Information Fig S3 .....                    | 5        |
| Supporting Information Fig S4 .....                    | 6        |
| Supporting Information Fig S5 .....                    | 7        |
| Supporting Information Fig S6 .....                    | 8        |
| Supporting Information Fig S7 .....                    | 9        |
| Supporting Information Table S1 .....                  | 10       |
| Supporting Information Table S2 .....                  | 11       |
